# Supplementary material for: NiRu–Mo2Ti2C3O2 as an efficient catalyst for alkaline hydrogen evolution reactions: the role of bimetallic site interactions in promoting Volmer-step kinetics
Source: Royal Society of Chemistry journal article supplement (doi:10.1039/d3cp05892a), 2024-01-01
Supplement: d3cp05892a1.pdf [file d3cp05892a1.pdf]

# **NiRu-Mo<sub>2</sub>Ti<sub>2</sub>C<sub>3</sub>O<sub>2</sub> as an efficient catalyst for alkaline hydrogen evolution reactions: the role of bimetallic site interactions in promoting Volmer-step kinetics**

Qing Xi <sup>a,b</sup>, Fangxia Xie <sup>a,b</sup>, Zijun Sun <sup>d</sup>, Jianxin Liu <sup>b</sup>, Xiaochao Zhang <sup>b</sup>, Yawen Wang <sup>b</sup>,  
Aijuan Zhou <sup>a</sup>, Xiaoli Ma <sup>a,\*</sup>, Xiaoming Gao <sup>c</sup>, Xiuping Yue <sup>a</sup>, Jun Ren <sup>b</sup>, Caimei Fan <sup>a,b</sup>, Xuan Jian  
<sup>c</sup>, Rui Li <sup>a,b\*</sup>

<sup>a</sup> *Shanxi Key Laboratory of Compound Air Pollutions Identification and Control, College of Environmental Science and Engineering, Taiyuan University of Technology, Taiyuan 030024, PR China*

<sup>b</sup> *Key Laboratory of Coal Science and Technology, Ministry of Education, College of Chemical Engineering and Technology, Taiyuan University of Technology, Taiyuan 030024, PR China*

<sup>c</sup> *College of Chemistry and Chemical Engineering, Shaanxi Key Laboratory of Chemical Reaction Engineering, Yan'an University, Yan'an 716000, PR China*

<sup>d</sup> *Xi'an North Huian Chemical Industries Co. Ltd, Xi'an 710302, PR China*

\*Corresponding author.

Tel.: +86 138 0341 9703, +86 132 3369 9182; fax: +86 0351 6018554.

*E-mail address:* 1026158815@qq.com (Ma X), lirui13233699182@163.com (Li R)

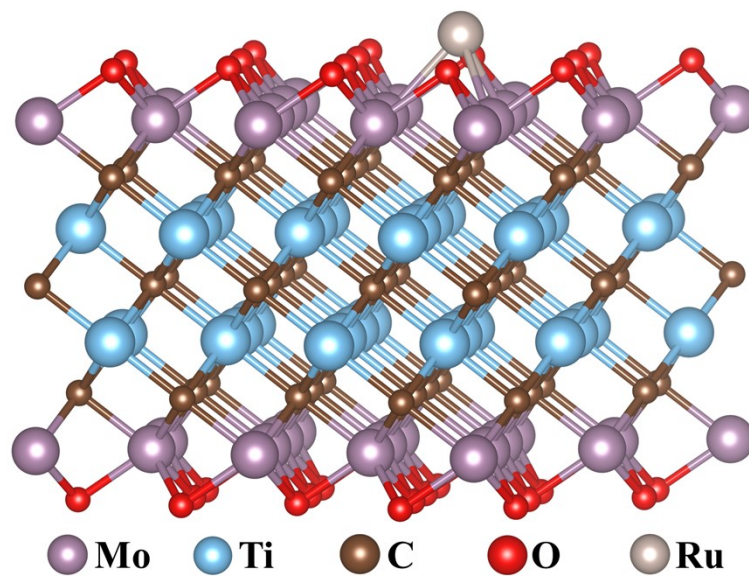

Fig. S1 Model structure diagram of  $\text{Ru}_5\text{-Mo}_2\text{Ti}_2\text{C}_3\text{O}_2$

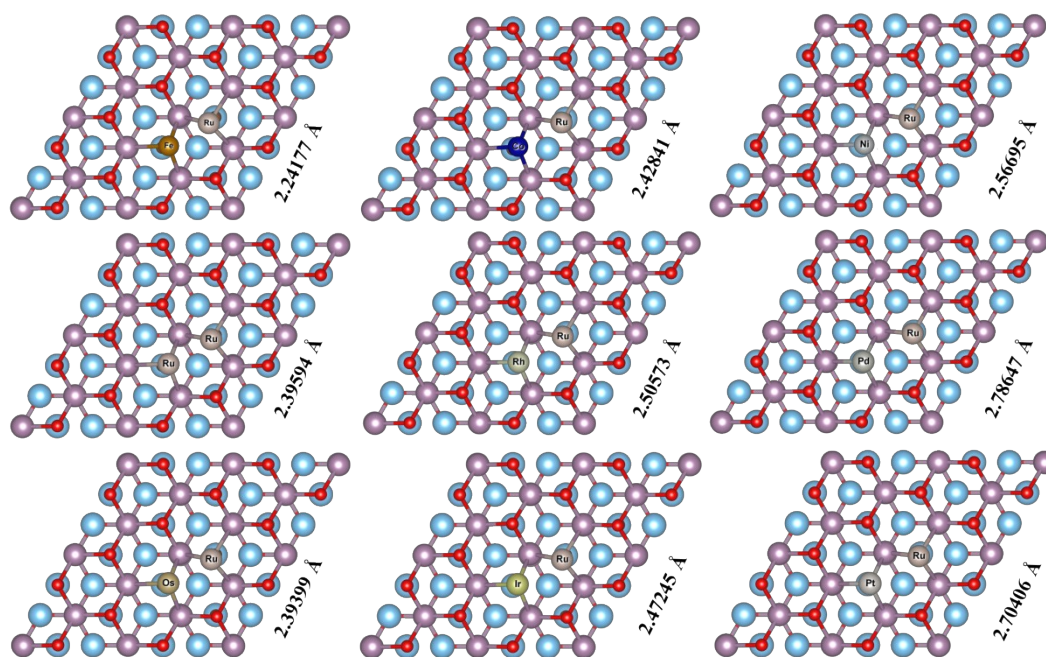

Fig. S2 Top view of Type-1 diatomic catalyst.

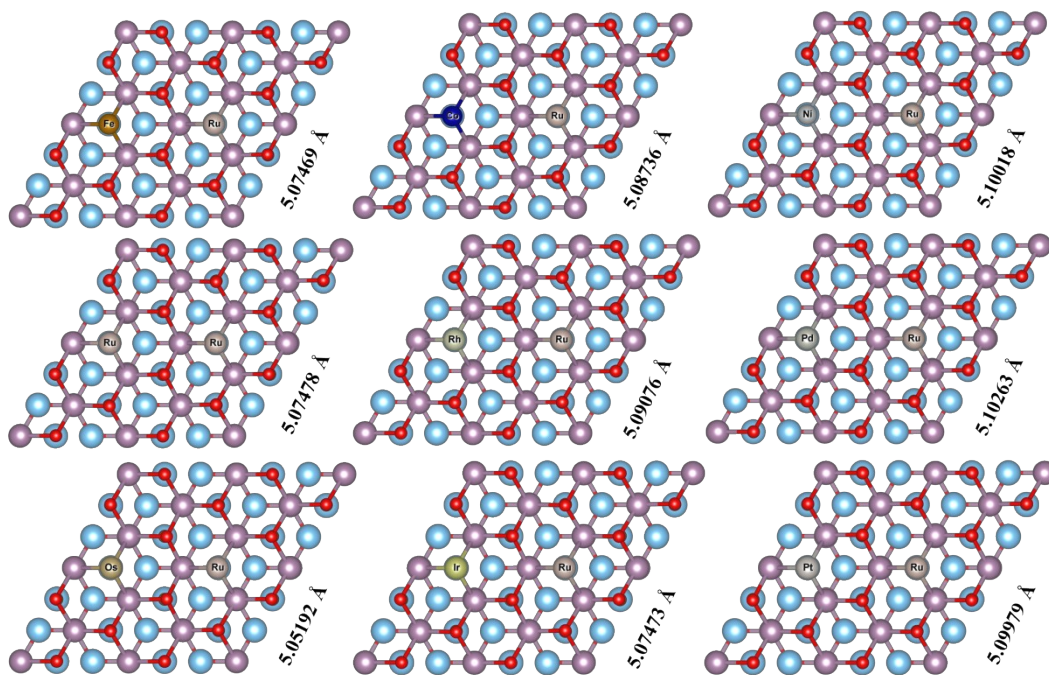

Fig. S3 Top view of Type-2 diatomic catalyst.

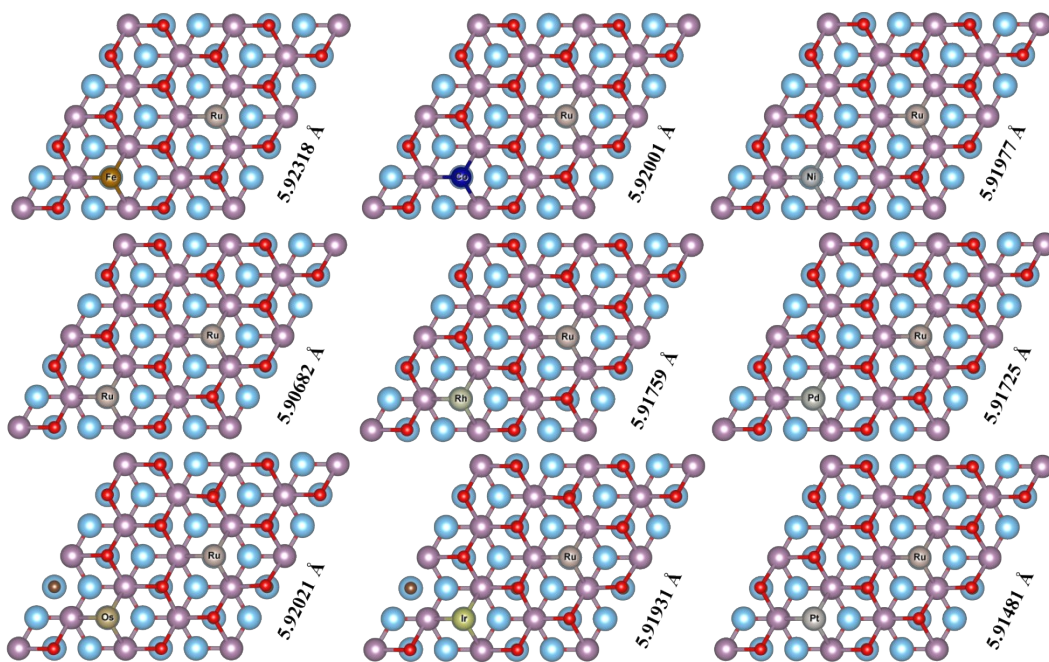

Fig. S4 Top view of Type-3 diatomic catalyst.

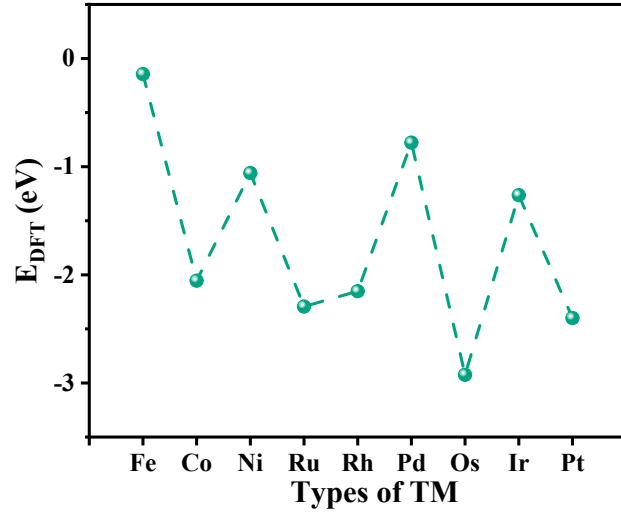

Fig. S5 The binding energy of TM<sub>n</sub> atoms on Ru<sub>5</sub>-Mo<sub>2</sub>Ti<sub>2</sub>C<sub>3</sub>O<sub>2</sub>.

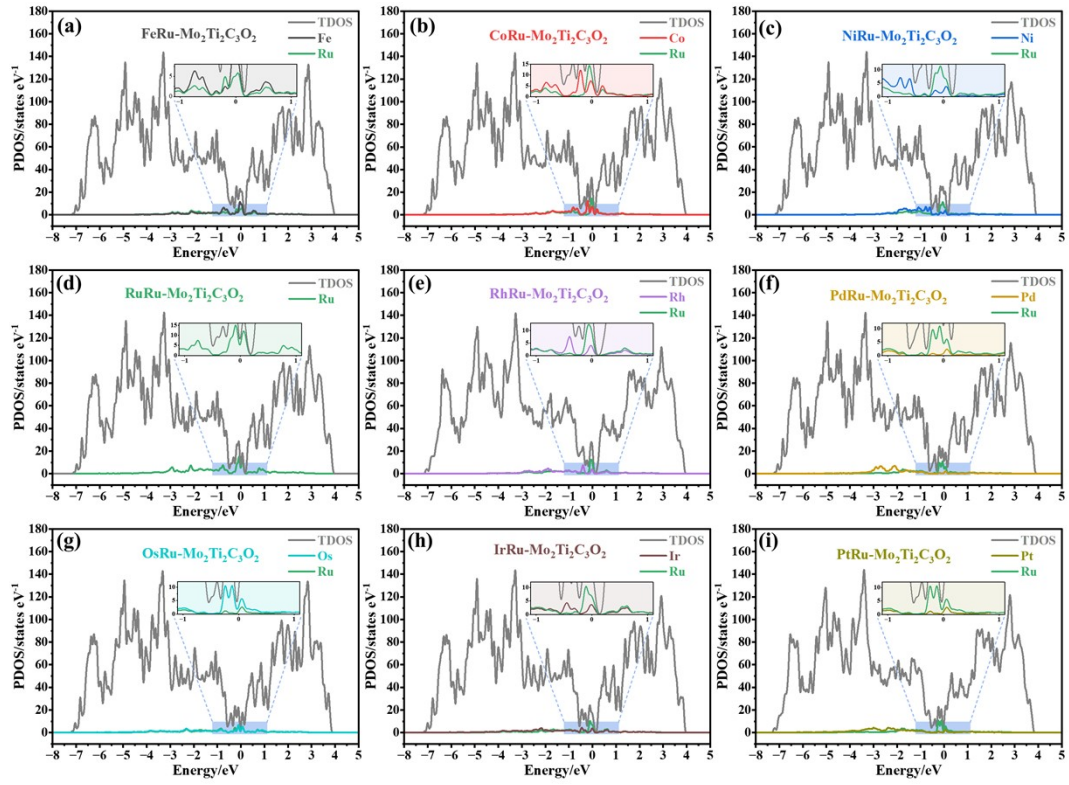

Fig. S6 PDOS diagram of TMRu-Mo<sub>2</sub>Ti<sub>2</sub>C<sub>3</sub>O<sub>2</sub>.

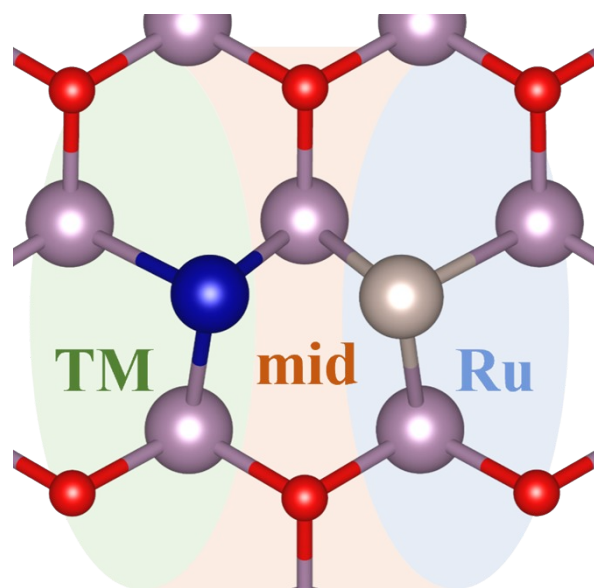

Fig. S7 TMRu-Mo<sub>2</sub>Ti<sub>2</sub>C<sub>3</sub>O<sub>2</sub> surface reaction site diagram.
